# Supplementary material for: Different states of synaptotagmin regulate evoked versus spontaneous release
Source: PubMed Central journal article supplement (PMC4804166; doi:10.1038/ncomms10971), 2016-03-22
Supplement: ncomms10971-s1.pdf [file ncomms10971-s1.pdf]

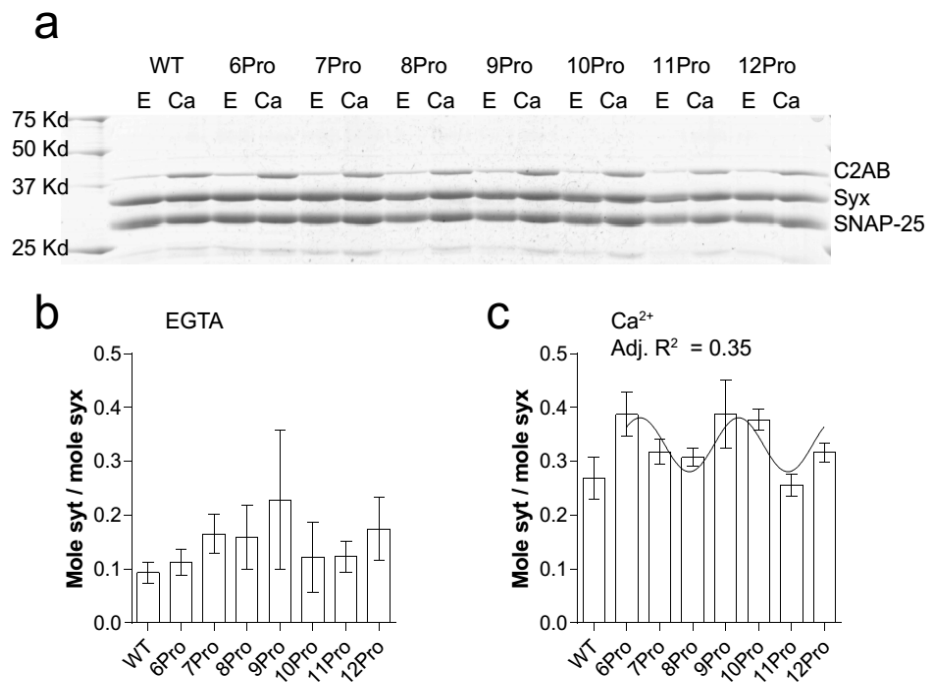

**Supplementary Figure 1.** t-SNARE binding activity of syt poly-proline linker mutants. (a) t-SNARE binding activity, defined as the mole of WT or mutant syt bound per mole of syx, was measured using a co-floation assay. The final  $[Ca^{2+}]_{free}$  was 1 mM; samples lacking  $Ca^{2+}$  contained 0.2 mM [EGTA]. Three independent experiments were carried out; a representative gel is shown. An uncropped image of an entire gel is provided in Supplementary Fig. 5a. Data from panel a were quantified by densitometry, and the extent of binding in both EGTA (b) and  $Ca^{2+}$  (c) was plotted. The plot for  $Ca^{2+}$  dependent t-SNARE binding was overlaid with a sine wave (c); while some periodicity was observed, it was not well fitted using a period of three. Data are represented as mean  $\pm$  SEM. Data were fitted using a sine wave function with a periodicity of three as described in Methods; an adjusted  $R^2$  value was generated to assess the goodness of the fit.

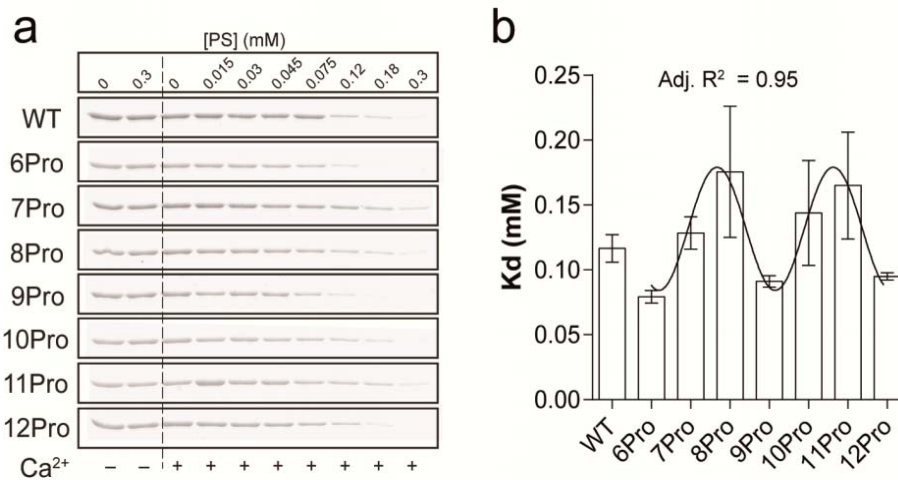

**Supplementary Figure 2.** Changes in the poly-proline linker affect the Ca<sup>2+</sup> promoted PS binding activity of syt. **(a)** Binding of WT or linker mutant forms of syt cytoplasmic domain to PS-bearing liposomes was monitored using a co-sedimentation assay; depletion of the supernatant was monitored via SDS-PAGE and staining with Coomassie blue, and these data were used to calculate the amount of bound material, in the absence (-; 0.2 mM EGTA) or presence (+) of 1 mM [Ca<sup>2+</sup>]<sub>free</sub>. An uncropped image of entire gels are provided in Supplementary Fig. 5b. No molecular markers were used because only one purified protein was loaded onto each gel. **(b)** Apparent K<sub>d</sub> values for syt•membrane interactions, were determined as described in Methods. Data were fitted using a sine wave function with a periodicity of three described in Methods; an adjusted R<sup>2</sup> value was generated to assess the goodness of the fit. Data are represented as mean ± SEM. For each condition, three independent trials were carried out.

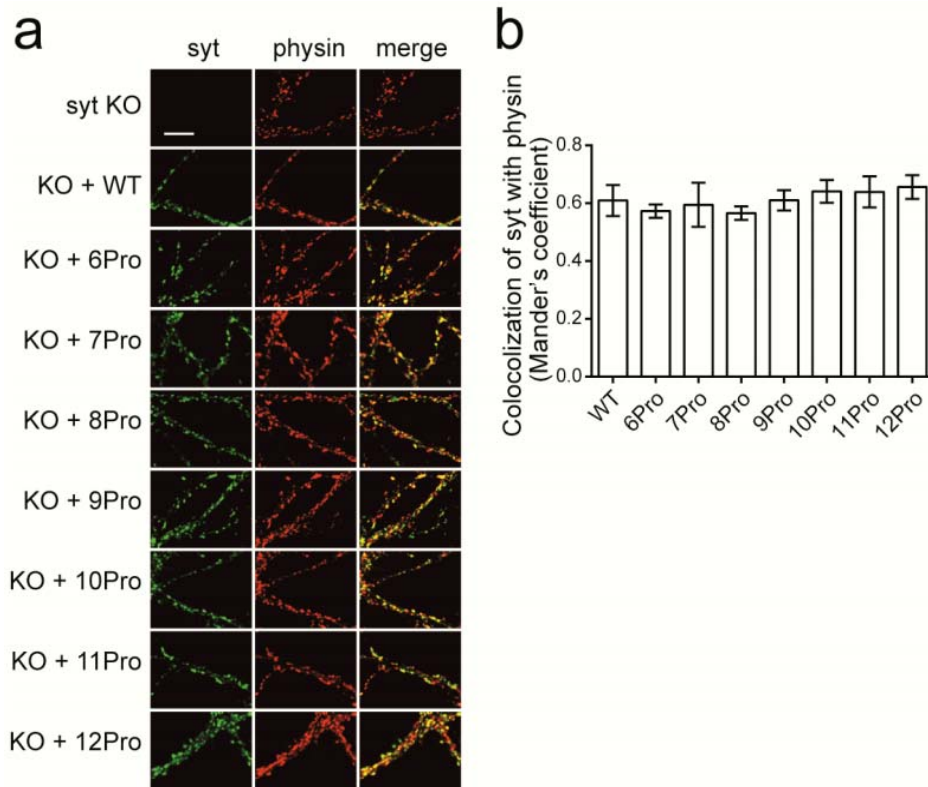

**Supplementary Figure 3.** Proline linker mutant forms of syt are properly targeted to synapses. **(a)** Full-length WT or proline linker mutant forms of syt were expressed in syt KO hippocampal neurons via lentiviral infection. Neurons were immunostained at 13 ~ 15 DIV using anti-syt (green) and anti-physin (red) antibodies. Shown are representative confocal images. Scale bar = 10  $\mu$ m. **(b)** The degree of colocalization was quantified and plotted; all syt constructs were efficiently targeted to synapses. Data are represented as mean  $\pm$  SEM. For each condition, n = 6, two independent cultures from independent litters of mice were examined, and three independent regions from each coverslip were analyzed. No significance was detected using one-way ANOVA, F = 0.5024, p = 0.8271.

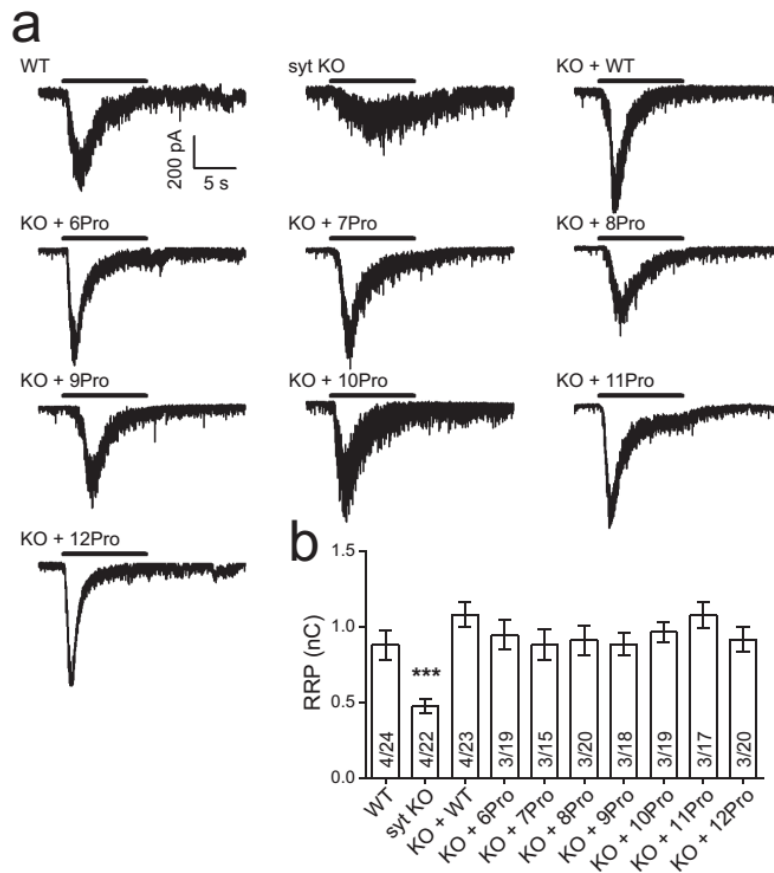

**Supplementary Figure 4.** All of the proline linker mutant forms of syt fully rescued the size of the RRP in syt KO neurons. **(a)** Representative EPSCs, elicited by perfusion of hypertonic sucrose (500 mM), were recorded from WT, syt KO, and syt KO neurons expressing full-length WT or proline linker mutant forms of syt; the black bars indicate the application of sucrose. **(b)** RRP size was quantified by integrating the sucrose-driven EPSCs. All of the proline linker mutants rescued the size of the RRP to a similar extent as WT syt. Data are represented as mean  $\pm$  SEM. \*\*\*  $p < 0.001$  versus WT, one-way ANOVA followed by Tukey's multiple comparisons test. For each condition, data were collected from 15~24 cells in a total of 6~8 coverslips, where 2 coverslips was obtained from each of 3~4 independent litters of mice. Recording were made from 2~5 cells per coverslip. The number of independent litters, N, and the number of cells, n, are indicated in the bar graph as N/n. Results from one-way ANOVA analysis are provided in Supplementary Table 7.

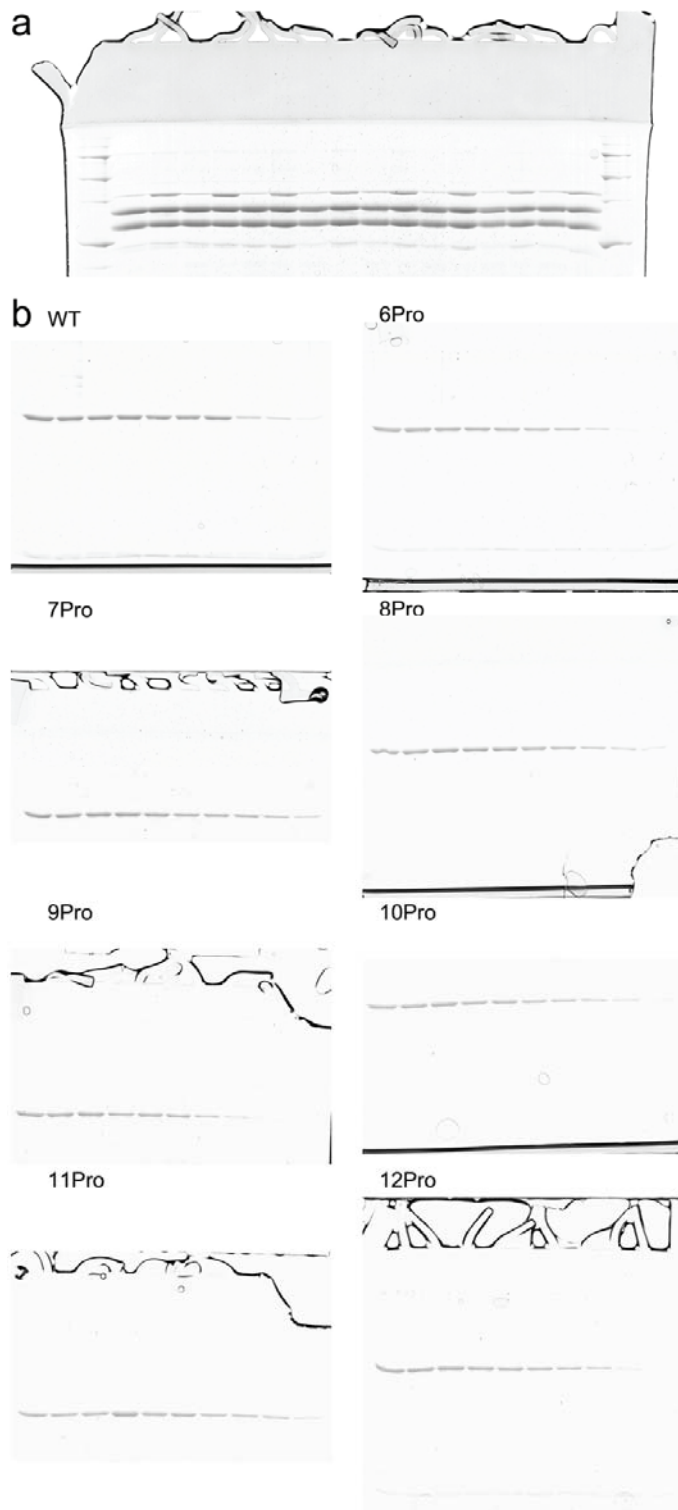

**Supplementary Fig. 5.** Uncropped images of entire gels associated with Supplementary Fig. 1a (a) and Supplementary Fig. 2a (b).

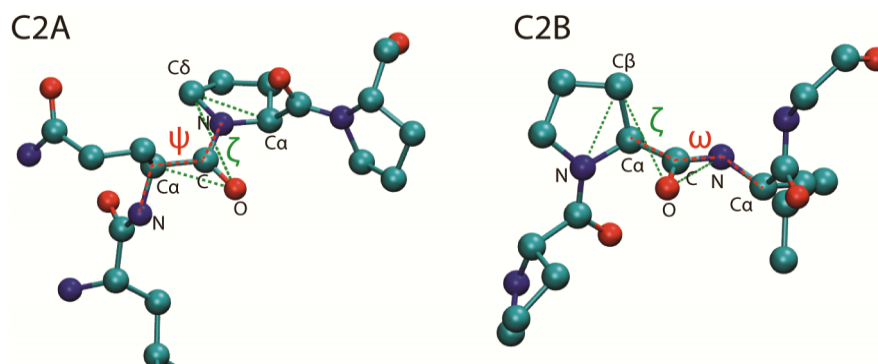

**Supplementary Figure 6.** Dihedral angles used to characterize the rotational flexibility of the poly-proline rod, with respect to the C2-domains, at the linkage point. These dihedral angles are used as collective variables in the metadynamics simulations.

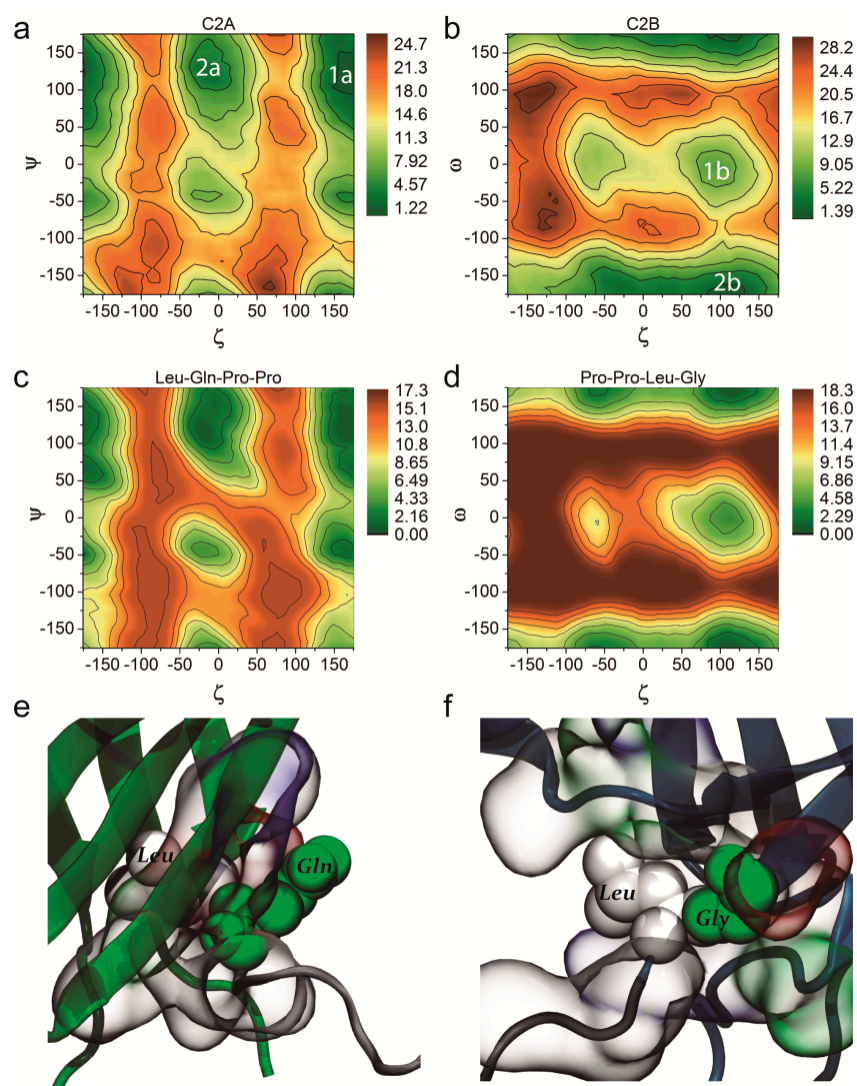

**Supplementary Figure 7.** Metadynamics simulations that characterize the relative orientation of the poly-proline segment and individual C2-domains. (a) Free energy surface for C2A-9Pro. The collective variables are (see Supplementary Fig. 6:  $\zeta$ , the pseudo dihedral angle Gln:CA-Gln:O-Pro:CD-Pro:CA, and  $\psi$ , the dihedral angle Gln:N-Gln:CA-Gln:C-Pro:N. The low-free-energy basins are indicated as **1a** and **2a**. (b) Free energy surface for C2B-9Pro. The collective variables are (see Supplementary Fig. 6:  $\zeta$ , the pseudo dihedral angle Pro:N-Pro:CB-Pro:O-Leu:N, and  $\omega$ , the dihedral angle Pro:CA-Pro:C-Leu:N-Leu:CA. The low-free-energy basins are labeled as **1b** and **2b**. (c) Free energy surface for a tetra-peptide model for the linkage between C2A and a poly-proline segment: Leu-Gln-Pro-Pro. (d) Free energy surface for a tetra-peptide model for the linkage between C2B and a poly-proline segment: Leu-Gln-Pro-Pro. (e) A snapshot from the metadynamics simulation illustrates the steric interaction between Leu and Gln residues at the linkage between C2A and the poly-proline segment that controls the relatively fixed orientation of the poly-proline relative to the C2A domain. (f) Same as in panel e, but focused on the linkage between C2B and the poly-proline segment.

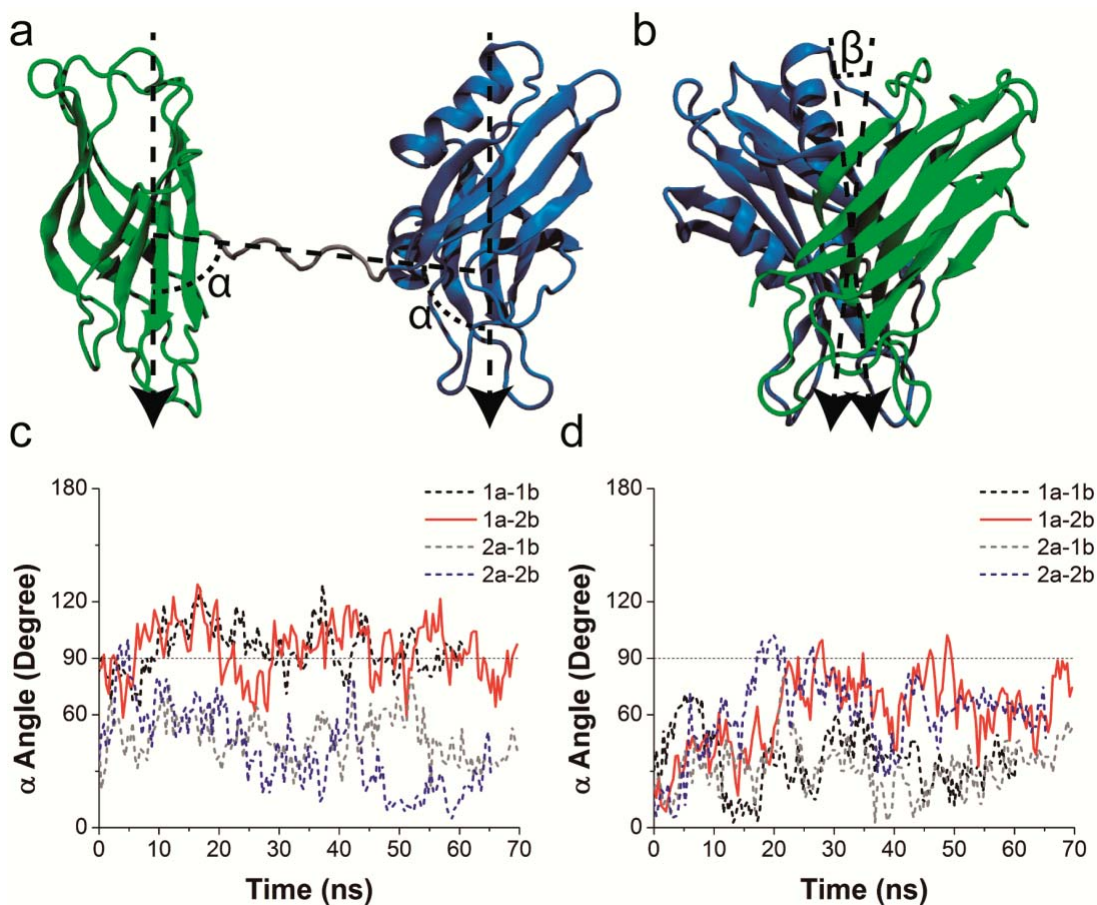

**Supplementary Figure 8.** Orientation of the Ca<sup>2+</sup> binding loops in the C2-domains. (a) Schematic illustration of the  $\alpha$  angles that represent the orientations of the Ca<sup>2+</sup> binding loops with respect to the *n*Pro linker. C2A is green, C2B is blue, and the polyproline linker is gray. (b) Schematic illustration of the  $\beta$  angles that represent the relative orientation of the Ca<sup>2+</sup> binding loops in the two C2-domains. The arrows illustrate the orientations of the Ca<sup>2+</sup> binding loops. (c) The C2A  $\alpha$  angles in the four C2A-9Pro-C2B models (see text and Supplementary Table 8 during MD simulations). (d) The C2B  $\alpha$  angles in the four C2A-9Pro-C2B models during MD simulations.



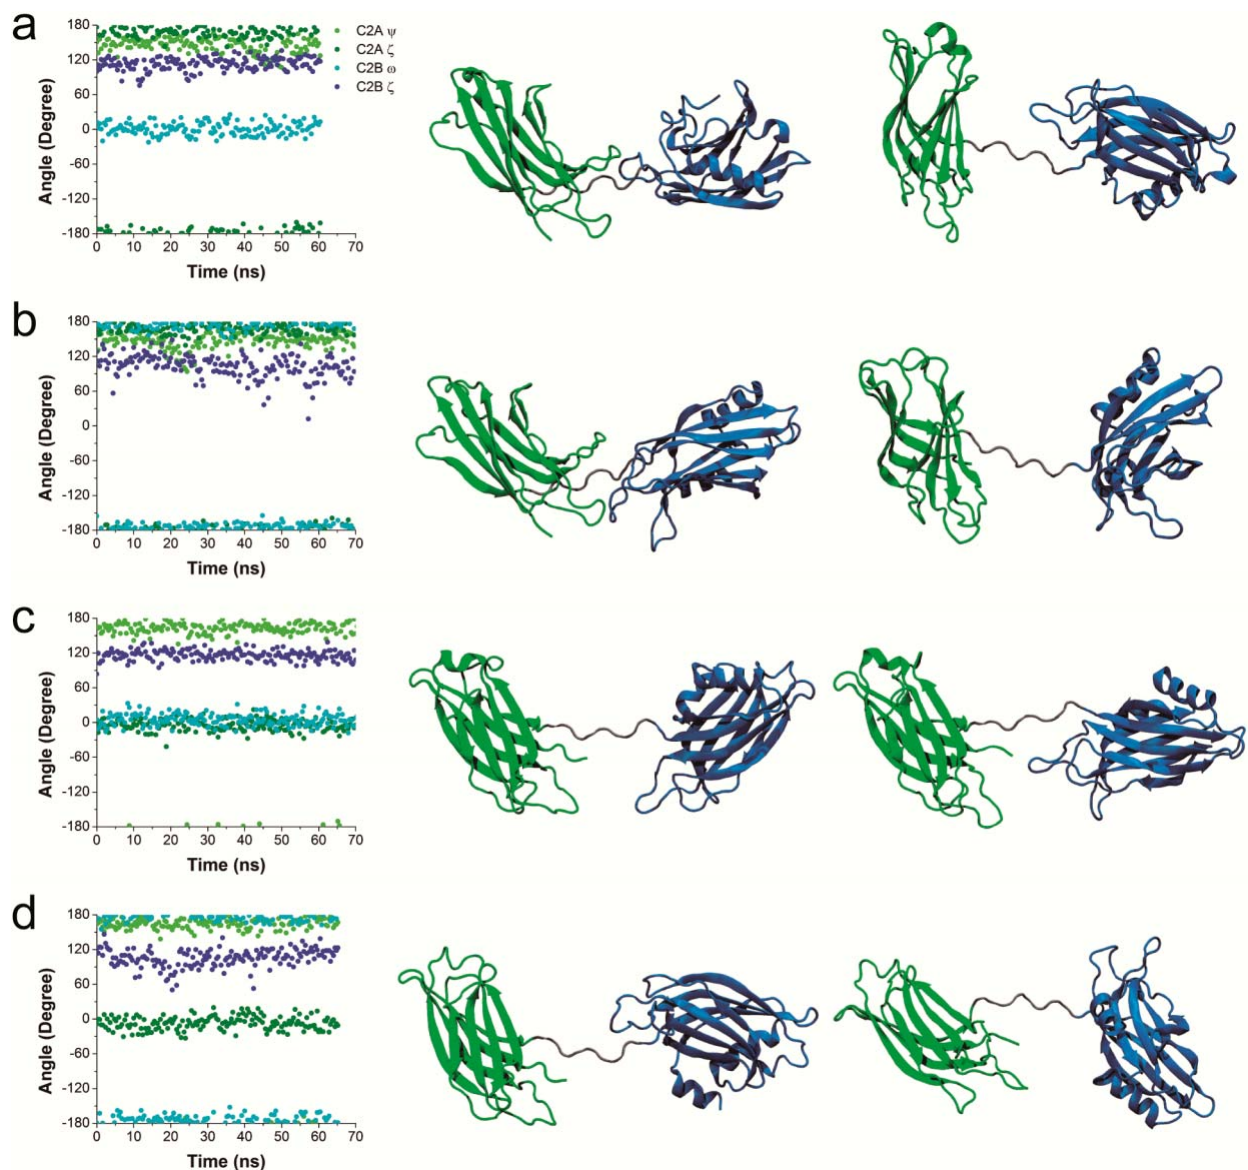

**Supplementary Figure 9.** Properties of the four C2A-9Pro-C2B models during MD simulations. The four rows summarize results for the (a) 1a-1b, (b) 1a-2b, (c) 2a-1b and (d) 2a-2b C2A-9Pro-C2B models, respectively. For each model, the left panel shows the time dependence of the collective variables used in the metadynamics simulations for C2A-9Pro and C2B-9Pro; the right panel illustrates the starting and final structures of each C2A-9Pro-C2B simulation. C2A is green, C2B is blue, and the poly-proline linker is gray.

**Supplementary Table 1:** Time-to-peak of evoked EPSCs recorded from WT, syt KO, and syt KO neurons expressing WT or linker mutant forms of syt

|        | time-to-peak (ms) | n  | <i>p</i> -value vs WT | <i>p</i> -value vs syt KO |
|--------|-------------------|----|-----------------------|---------------------------|
| WT     | 19.2 ± 1.0        | 25 |                       |                           |
| syt KO | 41.3 ± 7.3        | 21 | 0.014                 |                           |
| WT     | 18.5 ± 0.6        | 33 | 0.551                 | 0.005                     |
| 6Pro   | 20.7 ± 0.6        | 31 | 0.234                 | 0.01                      |
| 7Pro   | 20.0 ± 1.0        | 32 | 0.593                 | 0.009                     |
| 8Pro   | 19.9 ± 1.1        | 32 | 0.655                 | 0.008                     |
| 9Pro   | 19.5 ± 0.7        | 31 | 0.855                 | 0.007                     |
| 10Pro  | 18.9 ± 1.0        | 32 | 0.826                 | 0.006                     |
| 11Pro  | 18.7 ± 1.1        | 32 | 0.743                 | 0.006                     |
| 12Pro  | 17.2 ± 0.7        | 27 | 0.113                 | 0.003                     |

Note: Time-to-peak is defined as the time between the start of stimulation and the peak current. Data are represented as the mean ± SEM. *p*-values were determined using the Student's t-test.

**Supplementary Table 2.** Sequences of the primers used in this study.

| Primers used to generate proline linker mutants of syt |                                                             |
|--------------------------------------------------------|-------------------------------------------------------------|
| 6Pro Sense                                             | GAGTGGCGTGATCTCCAGCCGCCGCCGCCGCCGCCGCTGGGTGACATCTGCTTCTCC   |
| 6Pro Antisense                                         | GGAGAAGCAGATGTCACCCAGCGGCGGCGGCGGCGGCGGCTGGAGATCACGCCACTC   |
| 7Pro Sense                                             | GAGTGGCGTGATCTCCAGCCGCCGCCGCCGCCGCCGCCGCTGGGTGACATCTGCTTC   |
| 7Pro Antisense                                         | GAAGCAGATGTCACCCAGCGGCGGCGGCGGCGGCGGCGGCTGGAGATCACGCCACTC   |
| 8Pro Sense                                             | GGCGCGATCTCCAGCCGCCGCCGCCGCCGCCGCCGCCGCTGGGTGACATCTGC       |
| 8Pro Antisense                                         | GCAGATGTCACCCAGCGGCGGCGGCGGCGGCGGCGGCGGCTGGAGATCGCGCC       |
| 9Pro Sense                                             | GCGATCTCCAGCCGCCGCCGCCGCCGCCGCCGCCGCTGGGTGACAT              |
| 9Pro Antisense                                         | ATGTCACCCAGCGGCGGCGGCGGCGGCGGCGGCGGCGGCTGGAGATCGC           |
| 10Pro Sense                                            | GGCGCGATCTCCAGCCGCCGCCGCCGCCGCCGCCGCCGCCGCTGGGTGACATCTGC    |
| 10Pro Antisense                                        | GCAGATGTCACCCAGCGGCGGCGGCGGCGGCGGCGGCGGCGGCGGCTGGAGATCGCGCC |
| 11Pro Sense                                            | CGCGATCTCCAGCCGCCGCCGCCGCCGCCGCCGCCGCCGCCGCTGGGTGACATCTG    |
| 11Pro Antisense                                        | CAGATGTCACCCAGCGGCGGCGGCGGCGGCGGCGGCGGCGGCGGCGGCTGGAGATCGCG |
| 12Pro Sense                                            | GCGATCTCCAGCCGCCGCCGCCGCCGCCGCCGCCGCCGCCGCCGCTGGGTGACATC    |
| 12Pro Antisense                                        | GATGTCACCCAGCGGCGGCGGCGGCGGCGGCGGCGGCGGCGGCGGCGGCTGGAGATCGC |
| Primers used to generate point mutant forms of syt     |                                                             |
| C277A Sense                                            | GAGAAACTGGGTGACATCGCCTTCTCCCTCCGCTACGT                      |
| C277A Antisense                                        | ACGTAGCGGAGGGAGAAGGCGATGTCACCCAGTTTCTC                      |
| F234C Sense                                            | GTGTATGACTTTGATCGCTGTTCCAAGCACGACATCATC                     |
| F234C Antisense                                        | GATGATGTCGTGCTTGGAACAGCGATCAAAGTCATACAC                     |
| I367C Sense                                            | GTTTTGGACTATGACAAGTGTGGCAAGAACGACGCCATC                     |
| I367C Antisense                                        | GATGGCGTTCGTTCTTGCCCACTTGTTCATAGTCCAAAAC                    |

**Supplementary Table 3: sine wave functions parameters**

Equation:  $y = a + b \times \sin\left(\frac{x - c}{g} \times 2\pi\right)$

| Figure                | Adjusted R <sup>2</sup> | a            | b             | c            |
|-----------------------|-------------------------|--------------|---------------|--------------|
| Fig. 2c               | 0.67                    | 46.8 ± 0.80  | 4.12 ± 1.10   | -1.04 ± 0.13 |
| Fig. 3d               | 0.71                    | 6.04 ± 0.42  | -2.31 ± 0.56  | 0.73 ± 0.13  |
| Fig. 3e               | 0.73                    | 5.04 ± 0.30  | 1.71 ± 0.40   | -0.59 ± 0.12 |
| Fig. 4b               | 0.74                    | 255 ± 15     | -89.9 ± 20.4  | 0.76 ± 0.12  |
| Fig. 5b               | 0.81                    | 2.77 ± 0.45  | 2.19 ± 0.57   | -0.75 ± 0.15 |
| Fig. 6b               | 0.78                    | 0.11 ± 0.009 | 0.064 ± 0.01  | -0.81 ± 0.1  |
| Supplementary Fig. 1c | 0.35                    | 0.33 ± 0.02  | -0.05 ± 0.02  | 1.16 ± 0.21  |
| Supplementary Fig. 2b | 0.95                    | 0.13 ± 0.003 | 0.047 ± 0.005 | -2.04 ± 0.05 |

**Supplementary Table 4: ANOVA results for data in Fig. 4b**

**ANOVA summary**

F = 15.45

p-value < 0.0001

The differences among mea are statistically significant at 0.001 level.

|          | WT | Syt 1 KO | KO + WT | KO + 6Pro | KO + 7Pro | KO + 8Pro | KO + 9Pro | KO + 10Pro | KO + 11Pro | KO + 12Pro |
|----------|----|----------|---------|-----------|-----------|-----------|-----------|------------|------------|------------|
| <b>n</b> | 25 | 21       | 33      | 31        | 32        | 32        | 31        | 32         | 32         | 27         |

**Pairwise Tukey's multiple comparisons test:**

| <b>Adjusted p-values</b> | WT       | Syt 1 KO | KO + WT  | KO + 6Pro | KO + 7Pro | KO + 8Pro | KO + 9Pro | KO + 10Pro | KO + 11Pro | KO + 12Pro |
|--------------------------|----------|----------|----------|-----------|-----------|-----------|-----------|------------|------------|------------|
| Syt 1 KO                 | < 0.0001 |          |          |           |           |           |           |            |            |            |
| KO + WT                  | > 0.9999 | < 0.0001 |          |           |           |           |           |            |            |            |
| KO + 6Pro                | 0.5036   | < 0.0001 | 0.7478   |           |           |           |           |            |            |            |
| KO + 7Pro                | < 0.0001 | 0.0465   | < 0.0001 | 0.0196    |           |           |           |            |            |            |
| KO + 8Pro                | < 0.0001 | 0.1107   | < 0.0001 | 0.0058    | > 0.9999  |           |           |            |            |            |
| KO + 9Pro                | 0.746    | < 0.0001 | 0.9269   | > 0.9999  | 0.0052    | 0.0013    |           |            |            |            |
| KO + 10Pro               | 0.0012   | 0.0008   | 0.0026   | 0.4424    | 0.9584    | 0.833     | 0.2214    |            |            |            |
| KO + 11Pro               | 0.002    | 0.0005   | 0.0045   | 0.5411    | 0.9209    | 0.7524    | 0.2945    | >          |            |            |
| KO + 12Pro               | > 0.9999 | < 0.0001 | > 0.9999 | 0.5572    | < 0.0001  | < 0.0001  | 0.7955    | 0.0013     | 0.0023     |            |

| <b>Significance</b> | WT  | Syt 1 KO | KO + WT | KO + 6Pro | KO + 7Pro | KO + 8Pro | KO + 9Pro | KO + 10Pro | KO + 11Pro | KO + 12Pro |
|---------------------|-----|----------|---------|-----------|-----------|-----------|-----------|------------|------------|------------|
| Syt 1 KO            | *** |          |         |           |           |           |           |            |            |            |
| KO + WT             |     | ***      |         |           |           |           |           |            |            |            |
| KO + 6Pro           |     |          | ***     |           |           |           |           |            |            |            |
| KO + 7Pro           | *** | *        | ***     | *         |           |           |           |            |            |            |
| KO + 8Pro           | *** |          | ***     | **        |           |           |           |            |            |            |
| KO + 9Pro           |     | ***      |         |           | **        | **        |           |            |            |            |
| KO + 10Pro          | **  | ***      | **      |           |           |           |           |            |            |            |
| KO + 11Pro          | **  | ***      | **      |           |           |           |           |            |            |            |
| KO + 12Pro          |     | ***      |         |           | ***       | ***       | **        | **         |            |            |

\* p < 0.05, \*\* p < 0.01, and \*\*\* p < 0.001

**Supplementary Table 5: ANOVA results for data in Fig. 5b**

**ANOVA summary**

F = 9.9

p-value < 0.0001

The differences among means are statistically significant at 0.001 level.

|          | WT | Syt 1 KO | KO + WT | KO + 6Pro | KO + 7Pro | KO + 8Pro | KO + 9Pro |
|----------|----|----------|---------|-----------|-----------|-----------|-----------|
| <b>n</b> | 25 | 28       | 24      | 21        | 24        | 21        | 24        |

**Pairwise Tukey's multiple comparisons test:**

| <b>Adjusted p-values</b> | WT       | Syt 1 KO | KO + WT | KO + 6Pro | KO + 7Pro | KO + 8Pro | KO + 9Pro |
|--------------------------|----------|----------|---------|-----------|-----------|-----------|-----------|
| Syt 1 KO                 | 0.0035   |          |         |           |           |           |           |
| KO + WT                  | 0.9998   | 0.0151   |         |           |           |           |           |
| KO + 6Pro                | < 0.0001 | 0.695    | 0.0001  |           |           |           |           |
| KO + 7Pro                | > 0.9999 | 0.0026   | 0.9988  | < 0.0001  |           |           |           |
| KO + 8Pro                | > 0.9999 | 0.004    | 0.9988  | < 0.0001  | > 0.9999  |           |           |
| KO + 9Pro                | 0.0078   | > 0.9999 | 0.0289  | 0.6748    | 0.0058    | 0.0083    |           |

| <b>Significance</b> | WT  | Syt 1 KO | KO + WT | KO + 6Pro | KO + 7Pro | KO + 8Pro | KO + 9Pro |
|---------------------|-----|----------|---------|-----------|-----------|-----------|-----------|
| Syt 1 KO            | **  |          |         |           |           |           |           |
| KO + WT             |     | *        |         |           |           |           |           |
| KO + 6Pro           | *** |          | ***     |           |           |           |           |
| KO + 7Pro           |     | **       |         | ***       |           |           |           |
| KO + 8Pro           |     | **       |         | ***       |           |           |           |
| KO + 9Pro           | **  |          | *       |           | **        | **        |           |

\* p < 0.05, \*\* p < 0.01, and \*\*\* p < 0.001

**Supplementary Table 6: ANOVA results for data in Fig. 5c**

**ANOVA summary**

F = 0.4793

p-value = 0.823

The differences among means are not statistically significant at 0.05 level.

|          | WT | Syt 1 KO | KO + WT | KO + 6Pro | KO + 7Pro | KO + 8Pro | KO + 9Pro |
|----------|----|----------|---------|-----------|-----------|-----------|-----------|
| <b>n</b> | 25 | 28       | 24      | 21        | 24        | 21        | 24        |

**Pairwise Tukey's multiple comparisons test:**

| <b>Adjusted p-values</b> | WT     | Syt 1 KO | KO + WT | KO + 6Pro | KO + 7Pro | KO + 8Pro | KO + 9Pro |
|--------------------------|--------|----------|---------|-----------|-----------|-----------|-----------|
| Syt 1 KO                 | 0.9996 |          |         |           |           |           |           |
| KO + WT                  | 0.9997 | > 0.9999 |         |           |           |           |           |
| KO + 6Pro                | 0.9856 | 0.8929   | 0.908   |           |           |           |           |
| KO + 7Pro                | 0.9983 | 0.9633   | 0.9696  | > 0.9999  |           |           |           |
| KO + 8Pro                | 0.9991 | 0.9758   | 0.9798  | > 0.9999  | > 0.9999  |           |           |
| KO + 9Pro                | 0.9973 | 0.9537   | 0.9614  | > 0.9999  | > 0.9999  | > 0.9999  |           |

| <b>Significance</b> | WT | Syt 1 KO | KO + WT | KO + 6Pro | KO + 7Pro | KO + 8Pro | KO + 9Pro |
|---------------------|----|----------|---------|-----------|-----------|-----------|-----------|
| Syt 1 KO            |    |          |         |           |           |           |           |
| KO + WT             |    |          |         |           |           |           |           |
| KO + 6Pro           |    |          |         |           |           |           |           |
| KO + 7Pro           |    |          |         |           |           |           |           |
| KO + 8Pro           |    |          |         |           |           |           |           |
| KO + 9Pro           |    |          |         |           |           |           |           |

\* p < 0.05, \*\* p < 0.01, and \*\*\* p < 0.001

**Supplementary Table 7** ANOVA results for data in Supplementary Fig. 4a

**ANOVA summary**

F = 4.255

p-value < 0.0001

The differences among mea are statistically significant at 0.001 level.

|          | WT | Syt 1 KO | KO + WT | KO + 6Pro | KO + 7Pro | KO + 8Pro | KO + 9Pro | KO + 10Pro | KO + 11Pro | KO + 12Pro |
|----------|----|----------|---------|-----------|-----------|-----------|-----------|------------|------------|------------|
| <i>n</i> | 24 | 22       | 23      | 19        | 15        | 20        | 18        | 19         | 17         | 20         |

**Pairwise Tukey's multiple comparisons test:**

| <b>Adjusted p-values</b> | WT       | Syt 1 KO | KO + WT  | KO + 6Pro | KO + 7Pro | KO + 8Pro | KO + 9Pro | KO + 10Pro | KO + 11Pro | KO + 12Pro |
|--------------------------|----------|----------|----------|-----------|-----------|-----------|-----------|------------|------------|------------|
| Syt 1 KO                 | 0.0032   |          |          |           |           |           |           |            |            |            |
| KO + WT                  | > 0.6957 | < 0.0001 |          |           |           |           |           |            |            |            |
| KO + 6Pro                | 0.9997   | 0.0008   | 0.9715   |           |           |           |           |            |            |            |
| KO + 7Pro                | > 0.9999 | 0.0132   | 0.8347   | > 0.9999  |           |           |           |            |            |            |
| KO + 8Pro                | > 0.9999 | 0.0022   | 0.8829   | > 0.9999  | > 0.9999  |           |           |            |            |            |
| KO + 9Pro                | > 0.9999 | 0.0066   | 0.807    | > 0.9999  | > 0.9999  | > 0.9999  |           |            |            |            |
| KO + 10Pro               | 0.9984   | 0.0004   | 0.9889   | > 0.9999  | 0.9995    | > 0.9999  | 0.9995    |            |            |            |
| KO + 11Pro               | 0.8022   | < 0.0001 | > 0.9999 | 0.9854    | 0.892     | 0.9314    | 0.8764    | 0.9948     |            |            |
| KO + 12Pro               | > 0.9999 | 0.0017   | 0.9052   | > 0.9999  | > 0.9999  | > 0.9999  | > 0.9999  | > 0.9999   | 0.9459     |            |

| <b>Significance</b> | WT | Syt 1 KO | KO + WT | KO + 6Pro | KO + 7Pro | KO + 8Pro | KO + 9Pro | KO + 10Pro | KO + 11Pro | KO + 12Pro |
|---------------------|----|----------|---------|-----------|-----------|-----------|-----------|------------|------------|------------|
| Syt 1 KO            | ** |          |         |           |           |           |           |            |            |            |
| KO + WT             |    | ***      |         |           |           |           |           |            |            |            |
| KO + 6Pro           |    |          | ***     |           |           |           |           |            |            |            |
| KO + 7Pro           |    |          | *       |           |           |           |           |            |            |            |
| KO + 8Pro           |    |          | **      |           |           |           |           |            |            |            |
| KO + 9Pro           |    |          | **      |           |           |           |           |            |            |            |
| KO + 10Pro          |    |          | ***     |           |           |           |           |            |            |            |
| KO + 11Pro          |    |          | ***     |           |           |           |           |            |            |            |
| KO + 12Pro          |    |          | **      |           |           |           |           |            |            |            |

\* p < 0.05, \*\* p < 0.01, and \*\*\* p < 0.001



**Supplementary Table 8** Relative free energy ( $\Delta G$ , in kcal/mol) of dominant conformers based on metadynamics simulations for C2A/B-9Pro systems. See Supplementary Fig. 7 for the labels of the conformers.

| C2A/B-9Pro basins    | C2A-1a | C2A-2a | C2B-1b | C2B-2b |
|----------------------|--------|--------|--------|--------|
| Computed $\Delta G$  | 0.0    | 2.2    | 7.1    | 0.0    |
| C2A-9Pro-C2B models  | 1a-1b  | 1a-2b  | 2a-1b  | 2a-2b  |
| Estimated $\Delta G$ | 7.1    | 0.0    | 9.3    | 2.2    |

## Supplementary Notes 1

To determine the relative orientation of the tandem C2-domains of syt, when connected by a poly-proline rod, and to determine whether these domains are constrained, two types of molecular simulations were carried out. First, metadynamics simulations were used to compute the free energy surfaces for the rotation of the poly-proline rod with respect to each individual C2-domain. This information was then used to construct models for the tandem C2-domains connected by poly-proline linkers of nine, ten and eleven residues, and to compute the relative orientation of the tandem domains.

### Metadynamics simulations for individual C2-domains

As shown in Supplementary Fig. 7, the  $(\zeta, \psi)$  free energy map for C2A-9Pro has two dominant basins with  $\zeta \sim 0$  (basin **2a**) and  $180^\circ$  (basin **1a**); they are fairly close in free energy ( $\sim 2$  kcal/mol) but are separated by sufficiently high ( $\sim 15.3$  kcal/mol) barriers. These conformers are more stable, compared to the basins with  $\psi \sim -50^\circ$ , due to the hydrophobic packing of the connecting Leu residue against the nearby Gln (Supplementary Fig. 7e; in fact, the free energy map is qualitatively very similar to that computed for the isolated tetra-peptide that corresponds to the C2A-9Pro linkage (Leu-Gln-Pro-Pro, Supplementary Fig. 7c). Similarly, as shown in Supplementary Fig. 7b, the  $(\zeta, \omega)$  free energy map for C2B-9Pro is also highly similar to that for the isolated tetra-peptide that corresponds to the C2B-9Pro linkage (Pro-Pro-Leu-Gly, Supplementary Fig. 7d). The dominant basins (**1b** and **2b**) have  $\zeta \sim 120^\circ$ , to avoid the steric collision between Leu side chain and the proline rings (Supplementary Fig. 7f); the free energy difference between the two basins is rather large ( $\sim 7$  kcal/mol) since  $\omega \sim 180^\circ$  is the preferred conformation in the peptide.

### Conformer 1a-2b represents the energetically most stable C2A-9Pro-C2B model

The free energy maps indicate that for both C2-domain-9Pro linkages, the relative orientation of the poly-proline segment and the C2-domain is relatively rigid. Therefore, it is possible to build C2A-9Pro-C2B models by combining the low free-energy conformers for C2A-9Pro and C2B-9Pro; taking two dominant conformers for each (1a/2a and 1b/2b), we arrived at four possible models for C2A-9Pro-C2B. These four models were each simulated for  $\sim 70$  ns using NPT molecular dynamics (Supplementary Fig. 9).

With the assumption that there is minimal interaction between the two C2-domains when separated by a poly-proline rod, the relative stabilities of the four models can be estimated by combining the free energies of different C2-domain-linker conformers (see Supplementary Table 8). The results indicate that only two C2A-C2B conformations, **1a-2b** (Supplementary Fig. 7b) and **2a-2b** (Supplementary Fig. 7d) are relevant at RT, with the former being the dominant configuration with a population of about 98%. We note that the approximation of minimal domain-domain interaction in C2A-9Pro-C2B appears a valid one since the two domains indeed remain far apart in all four relaxed models (see Supplementary Fig. 9); although the minimal domain-domain distances (data not shown) may reach  $\sim 5$ - $10$  Å during some segments of the trajectories, persistent inter-domain contacts were not observed. Moreover, the internal

structures of the two domains in the C2A-9Pro-C2B simulations remain very similar to those in the isolated C2-domain-9Pro simulations, again supporting the assumption of minimal domain interactions. Finally, the collective variables chosen in the metadynamics simulations remain close to their expected values during all C2A-9Pro-C2B simulations (Supplementary Fig. 9 first column), confirming that these dihedral angles remain the key variables for characterizing the relative poly-proline/C2 orientations; one C2-domain is not strongly perturbed by the presence of the other C2-domain. The fact that these dihedral angles remain largely constant during the simulations again highlight the relative rigidity of the poly-proline/C2 connection; the C2-domains, however, have sufficient time during the simulation to equilibrate their local interactions as indicated by the changes in the orientation of the  $\text{Ca}^{2+}$ -binding loops relative to the poly-pro linker (see beginning and final structures shown in Supplementary Fig. 9 and the time dependence of the alpha angles in Supplementary Fig. 8). Therefore, although a more precise estimate of the populations of these conformers could be obtained with metadynamics simulations for the C2A-9Pro-C2B system in the presence of both calcium ions and multi-component lipid membrane, which would be highly demanding computationally (in addition to the concern of using a non-polarizable force field for calcium-protein interactions<sup>1</sup>), the computational results presented herein provide adequate support for **1a-2b** being the dominant conformation for the tandem C2-domains connected with a poly-proline rod, especially viewed together with results from penetration assay in this study and the NMR data from Ref. <sup>2</sup>. In subsequent MD simulations for C2A-*n*Pro-C2B as *n* is varied from 9 to 11, only the **1a-2b** conformer is considered. The observation that the 2a-2b conformation is estimated to be only ~2 kcal/mol higher in free energy is consistent with the experimental observation that an alternative C2A-C2B orientation is likely to play a different physiological role during exocytosis).

## Supplementary references

1. Li, H., *et al.* Representation of Ion–Protein Interactions Using the Drude Polarizable Force-Field. *J. Phys. Chem. B* **119**, 9401-9416 (2015).
2. Seven, A.B., Brewer, K.D., Shi, L., Jiang, Q.X. & Rizo, J. Prevalent mechanism of membrane bridging by synaptotagmin-1. *Proc. Natl. Acad. Sci. USA* **110**, E3243-3252 (2013).
